# Supplementary material
Source: PubMed Central journal article supplement (PMC6821964)
Supplement: AEM.01209-19-s0001.pdf [file AEM.01209-19-s0001.pdf]

Table S1. Whole-genome-level polymorphisms among phages analyzed in this study

| Location    | Sb1_ref   | Sb1 8383      | Sb1M 9832     | Sb1M 6168     | Codon | ORF  | Gene                                                 | Prot_ID        |
|-------------|-----------|---------------|---------------|---------------|-------|------|------------------------------------------------------|----------------|
| 1           | G         | A             | A             | A             | NA    | NA   | NA                                                   | NA             |
| 2           | T [L]     | C [S]         | C [S]         | C [S]         | 2nd   | 1    | hypothetical protein                                 | AEJ79812.1     |
| 9849        | T [K]     | C [R]         | C [R]         | C [R]         | 2nd   | 21   | conserved hypothetical protein                       | AEJ79664.1     |
| 9910        | C [V]     | G [L]         | G [L]         | G [L]         | 3rd   | 21   | conserved hypothetical protein                       | AEJ79664.1     |
| 14529       | G         | A             | A             | A             | NA    | NA   | NA                                                   | NA             |
| 14558       | G [S]     | A [F]         | A [F]         | A [F]         | 2nd   | 30   | conserved hypothetical protein                       | AEJ79673.1     |
| 14657       | A [F]     | G [S]         | G [S]         | G [S]         | 2nd   | 30   | conserved hypothetical protein                       | AEJ79673.1     |
| 14859       | A [I]     | T [stop]      | T [stop]      | T [stop]      | 2nd   | 31   | conserved hypothetical protein                       | AEJ79674.1     |
| 14860       | T [I]     | A [stop]      | A [stop]      | A [stop]      | 3rd   | 31   | conserved hypothetical protein                       | AEJ79674.1     |
| 14866       | A [C]     | G [R]         | G [R]         | G [R]         | 3rd   | 31   | conserved hypothetical protein                       | AEJ79674.1     |
| 14882       | T [K]     | C [K]         | C [K]         | C [K]         | 1st   | 31   | conserved hypothetical protein                       | AEJ79674.1     |
| 16431       | G [T]     | T [K]         | T [K]         | T [K]         | 2nd   | 35   | conserved hypothetical protein                       | AEJ79678.1     |
| 17107       | T [R]     | T [R]         | T [R]         | T [R]         | 1st   | 35   | conserved hypothetical protein                       | AEJ79678.1     |
| 17782       | C [D]     | A [Y]         | A [Y]         | A [Y]         | 3rd   | 35   | conserved hypothetical protein                       | AEJ79678.1     |
| 21046       | A         | G             | G             | G             | NA    | NA   | promoter proximal to ORF 41 reverse                  | NA             |
| 24175       | NA        | AA-ins [stop] | AA-ins [stop] | AA-ins [stop] | 1st   | 48   | conserved hypothetical protein                       | AEJ79691.1     |
| 24339       | del 60bp  | ins 60bp      | ins 60bp      | ins 60bp      | NA    | 49   | conserved hypothetical protein                       | AEJ79692.1     |
| 31769       | G [H]     | C [D]         | C [D]         | C [D]         | 3rd   | 58   | conserved hypothetical protein                       | AEJ79699.1     |
| 31870       | G [T]     | T [N]         | T [N]         | T [N]         | 2nd   | 58   | conserved hypothetical protein                       | AEJ79699.1     |
| 31872       | G [A]     | T [A]         | T [A]         | T [A]         | 1st   | 58   | conserved hypothetical protein                       | AEJ79699.1     |
| 31888       | G [A]     | A [V]         | A [V]         | A [V]         | 2nd   | 58   | conserved hypothetical protein                       | AEJ79699.1     |
| 31956       | G         | T             | T             | T             | NA    | NA   | NA                                                   | NA             |
| 31964       | G         | T             | T             | T             | NA    | NA   | NA                                                   | NA             |
| 31977       | G         | T             | T             | T             | NA    | NA   | NA                                                   | NA             |
| 31990       | G         | A             | A             | A             | NA    | NA   | NA                                                   | NA             |
| 31991       | G         | A             | A             | A             | NA    | NA   | NA                                                   | NA             |
| 31992       | G         | C             | C             | C             | NA    | NA   | NA                                                   | NA             |
| 32005       | C         | T             | T             | T             | NA    | NA   | NA                                                   | NA             |
| 32018       | G         | A             | A             | A             | NA    | NA   | NA                                                   | NA             |
| 32021       | G         | A             | A             | A             | NA    | NA   | NA                                                   | NA             |
| 32060       | G         | T             | T             | T             | NA    | NA   | NA                                                   | NA             |
| 32061       | G         | T             | T             | T             | NA    | NA   | NA                                                   | NA             |
| 32092       | G         | T             | T             | T             | NA    | NA   | NA                                                   | NA             |
| 32113       | G         | T             | T             | T             | NA    | NA   | NA                                                   | NA             |
| 32119       | G         | T             | T             | T             | NA    | NA   | NA                                                   | NA             |
| 32268       | A         | G             | G             | G             | NA    | NA   | iteron repeat                                        | NA             |
| 32270       | A         | C             | C             | C             | NA    | NA   | iteron repeat                                        | NA             |
| 32271       | G         | A             | A             | A             | NA    | NA   | iteron repeat                                        | NA             |
| 32313       | TA        | GT            | GT            | GT            | NA    | NA   | iteron repeat                                        | NA             |
| 32317       | AT        | TA            | TA            | TA            | NA    | NA   | iteron repeat                                        | NA             |
| 32325       | 4X iteron | 3X iteron     | 3X iteron     | 3X iteron     | NA    | NA   | iteron repeat                                        | NA             |
| 35900       | T [T]     | C [T]         | C [T]         | C [T]         | 3rd   | 65   | terminase large subunit                              | AEJ79707.1     |
| 36038       | A [P]     | T [P]         | T [P]         | T [P]         | 3rd   | 65   | terminase large subunit                              | AEJ79707.1     |
| 36908       | T [Y]     | C [Y]         | C [Y]         | C [Y]         | 3rd   | 65   | terminase large subunit                              | AEJ79707.1     |
| 37974       | T [I]     | C [I]         | C [I]         | C [I]         | 3rd   | 66   | conserved hypothetical protein                       | AEJ79708.1     |
| 38060       | T         | C             | C             | C             | *     | 67   | conserved hypothetical protein                       | AEJ79709.1     |
| 38238       | T [S]     | C [S]         | C [S]         | C [S]         | 3rd   | 68   | conserved hypothetical protein                       | AEJ79710.1     |
| 38274       | T [S]     | C [S]         | C [S]         | C [S]         | 3rd   | 68   | conserved hypothetical protein                       | AEJ79710.1     |
| 38307       | C [Y]     | T [Y]         | T [Y]         | T [Y]         | 3rd   | 68   | conserved hypothetical protein                       | AEJ79710.1     |
| 39668-39685 | NA        | PEP -> P      | PEP -> P      | PEP -> P      | NA    | 71   | conserved hypothetical protein                       | AEJ79711.1     |
| 39700       | NA        | C             | C             | C             | NA    | 71   | conserved hypothetical protein                       | AEJ79711.1     |
| 39933       | T         | Tdel          | Tdel          | Tdel          | NA    | NA   | terminator overlapping ORF71                         | NA             |
| 40973       | A [K]     | G [K]         | G [K]         | G [K]         | 3rd   | 75   | putative portal protein                              | AEJ79714.1     |
| 47961       | A [E]     | C [D]         | Adel          | Adel          | 3rd   | 82   | conserved hypothetical protein                       | AEJ79720.1     |
| 47964       | C [G]     | T [G]         | C [G]         | C [G]         | 3rd   | 82   | conserved hypothetical protein                       | AEJ79720.1     |
| 47966       | T         | A             | T             | T             | 2nd   | 82   | conserved hypothetical protein                       | AEJ79720.2     |
| 47967       | A         | T             | A             | A             | 2nd   | 82   | conserved hypothetical protein                       | AEJ79720.3     |
| 47968       | T         | A             | T             | T             | 2nd   | 82   | conserved hypothetical protein                       | AEJ79720.4     |
| 47971       | A         | G             | A             | A             | NA    | NA   | NA                                                   | NA             |
| 47972       | N         | Gins          | Gins          | Gins          | NA    | NA   | NA                                                   | NA             |
| 47999       | N         | del           | del           | del           | NA    | NA   | NA                                                   | NA             |
| 48023       | NA        | Gins          | Gins          | Gins          | NA    | NA   | NA                                                   | NA             |
| 54383       | C         | A             | A             | A             | 3rd   | 92   | conserved hypothetical protein                       | AEJ79731.1     |
| 54384       | C [A]     | Gins          | Gins          | Gins          | 1st   | 92   | conserved hypothetical protein                       | AEJ79731.1     |
| 54444       | G         | Gdel          | Gdel          | Gdel          | NA    | NA   | NA                                                   | NA             |
| 62389       | C [P]     | C [P]         | C [P]         | C [P]         | 1st   | 98   | putative glycerophosphoryl diester phosphodiesterase | YP_008873613.1 |
| 69638       | T [F]     | C [S]         | C [S]         | C [S]         | 2nd   | 103  | conserved hypothetical protein                       | AEJ79740.1     |
| 80037       | T [Y]     | C [Y]         | C [Y]         | C [Y]         | 3rd   | 110  | DNA helicase UvsW                                    | AEJ79747.1     |
| 80644       | G [A]     | A [T]         | A [T]         | A [T]         | 1st   | 110  | DNA helicase UvsW                                    | AEJ79747.1     |
| 82588       | C [H]     | A [N]         | A [N]         | A [N]         | 1st   | 112  | putative DNA helicase subunit                        | AEJ79749.1     |
| 82748       | G [G]     | A [E]         | A [E]         | A [E]         | 2nd   | 112  | putative DNA helicase subunit                        | AEJ79749.1     |
| 82749       | G [G]     | A [E]         | A [E]         | A [E]         | 3rd   | 112  | putative DNA helicase subunit                        | AEJ79749.1     |
| 83363       | T [V]     | C [A]         | C [A]         | C [A]         | 2nd   | 112  | putative DNA helicase subunit                        | AEJ79749.1     |
| 87718       | T [S]     | T [S]         | T [S]         | T [S]         | 1st   | 116  | conserved hypothetical protein                       | AEJ79753.1     |
| 87884       | C [P]     | A [P]         | A [P]         | A [P]         | 3rd   | misc | misc feature putative DNA primase                    | NA             |
| 87889       | G [G]     | A [E]         | A [E]         | A [E]         | 2nd   | misc | misc feature                                         | NA             |
| 87906       | T [I]     | C [L]         | C [L]         | C [L]         | 1st   | misc | misc feature                                         | NA             |
| 87917       | G [W]     | T [C]         | T [C]         | T [C]         | 3rd   | misc | misc feature                                         | NA             |
| 87939       | A [K]     | Ains          | Ains          | Ains          | 1st   | misc | misc feature                                         | NA             |
| 87949       | T [F]     | C [F]         | C [F]         | C [F]         | 2nd   | misc | misc feature                                         | NA             |
| 87955       | stop      | T [V]         | T [V]         | T [V]         | 2nd   | misc | misc feature                                         | NA             |
| 87957       | G [G]     | A [K]         | A [K]         | A [K]         | 1st   | misc | misc feature                                         | NA             |
| 87970       | T         | C [D]         | C [D]         | C [D]         | 3rd   | misc | misc feature                                         | NA             |
| 87972       | N         | C             | C             | C             | NA    | misc | misc feature                                         | NA             |
| 88228       | G         | A [G] 3rd     | A [G] 3rd     | A [G] 3rd     | NA    | misc | misc feature                                         | NA             |
| 88273       | C         | T [P] 3rd     | T [P] 3rd     | T [P] 3rd     | NA    | misc | misc feature                                         | NA             |
| 89697       | A [E]     | G [E]         | G [E]         | G [E]         | 3rd   | 120  | conserved hypothetical protein                       | AEJ79755.1     |
| 89699       | A [E]     | C [A]         | C [A]         | C [A]         | 2nd   | 120  | conserved hypothetical protein                       | AEJ79755.1     |
| 89703       | A [Q]     | G [Q]         | G [Q]         | G [Q]         | 3rd   | 120  | conserved hypothetical protein                       | AEJ79755.1     |
| 89707       | G [E]     | A [K]         | A [K]         | A [K]         | 1st   | 120  | conserved hypothetical protein                       | AEJ79755.1     |
| 90611       | T [G]     | C [G]         | C [G]         | C [G]         | 3rd   | 122  | NrdI flavodoxin-like protein                         | AEJ79757.1     |
| 98777       | T [Y]     | C [H]         | C [H]         | C [H]         | 1st   | 129b | RFO19-like protein                                   | AEJ79811.1     |
| 99619       | A [K]     | G [K]         | G [K]         | G [K]         | 3rd   | 132  | putative HNH endonuclease                            | AEJ79765.1     |
| 100,707     | G [M]     | Tins [I]      | Tins [I]      | Tins [I]      | 3rd   | 129c | NA                                                   | NA             |
| 100739      | A [K]     | delA [D]      | delA [D]      | delA [D]      | 2nd   | 129c | NA                                                   | NA             |
| 100740      | G [K]     | delG [D]      | delG [D]      | delG [D]      | 3rd   | 129c | NA                                                   | NA             |

|                  |                   |                   |                   |                   |     |           |                                                  |                |
|------------------|-------------------|-------------------|-------------------|-------------------|-----|-----------|--------------------------------------------------|----------------|
| 100983           | N                 | A                 | A                 | A                 | d   | 135       | conserved hypothetical protein                   | AEJ79766.1     |
| 101788           | A                 | G                 | G                 | G                 | NA  | NA        | NA                                               | NA             |
| 101798           | NA                | Tins              | Tins              | Tins              | NA  | NA        | NA                                               | NA             |
| 101833           | C[A]              | C[A]              | C[A]              | A[E]              | 2nd | ORF020 G1 | hypothetical protein                             | AAAX92102.1    |
| 101838           | T                 | A                 | A                 | A                 | NA  | NA        | NA                                               | NA             |
| 102174           | C                 | C                 | C                 | C                 | NA  | NA        | NA                                               | NA             |
| 107725           | G                 | Gdel              | Gdel              | Gdel              | NA  | NA        | misc feature                                     | NA             |
| 108037           | A                 | G                 | A                 | A                 | NA  | NA        | NA                                               | NA             |
| 109146           | G[R]              | G[R]              | T[I]              | T[I]              | 2nd | 147       | hypothetical protein                             | YP_008873656.  |
| 109190           | G[A]              | G[A]              | G[A]              | G[A]              | 1st | 147       | hypothetical protein                             | YP_008873656.  |
| 109269           | GATATT[DI]        | GATATT[DI]        | GATATT[DI]        | GATATT[DI]        | NA  | 147       | hypothetical protein                             | YP_008873656.1 |
| 109577           | A [V]             | T [V]             | T [V]             | T [V]             | 3rd | 148       | conserved hypothetical protein                   | AEJ79777.1     |
| 109834           | G[V]              | G[V]              | A[I]              | G[V]              | 1st | 149       | hypothetical protein                             | YP_008873658.1 |
| 109903           | A[K]              | A[K]              | G[E]              | G[E]              | 1st | 149       | hypothetical protein                             | YP_008873658.1 |
| 114893           | A [R]             | G [G]             | G [G]             | G [G]             | 3rd | 157       | conserved hypothetical protein                   | AEJ79786.1     |
| 114974           | G [E]             | A [K]             | A [K]             | A [K]             | 1st | 157       | conserved hypothetical protein                   | AEJ79786.1     |
| 116,459          | NA                | ins 7490bp        | ins 7490bp        | ins 7490bp        | NA  | NA        | misc feature                                     | NA             |
| 119846           | C [P]             | A [T]             | A [T]             | A [T]             | 1st | 165       | putative nicotinamide phosphoribosyl transferase | AEJ79793.1     |
| 120185           | NA                | Cdel              | Cdel              | Cdel              | NA  | NA        | NA                                               | NA             |
| 120261           | A                 | G                 | G                 | G                 | NA  | NA        | NA                                               | NA             |
| 120292           | C                 | G                 | G                 | G                 | NA  | NA        | NA                                               | NA             |
| 120304           | NA                | Tins              | Tins              | Tins              | NA  | NA        | NA                                               | NA             |
| 120350           | A                 | G                 | G                 | G                 | NA  | NA        | NA                                               | NA             |
| 123276 to 123740 | Region 2 allele A | Region 2 allele B | Region 2 allele C | Region 2 allele C | NA  | NA        | NA                                               | NA             |
| 124516           | T [L]             | C [L]             | C [L]             | C [L]             | 1st | 177       | conserved hypothetical protein                   | AEJ79802.1     |
| 124573           | G                 | A                 | A                 | A                 | NA  | NA        | NA                                               | NA             |
| 124575           | C                 | Cdel              | Cdel              | Cdel              | NA  | NA        | NA                                               | NA             |
| 127101           | del               | Ains              | Ains              | Ains              | NA  | NA        | NA                                               | NA             |

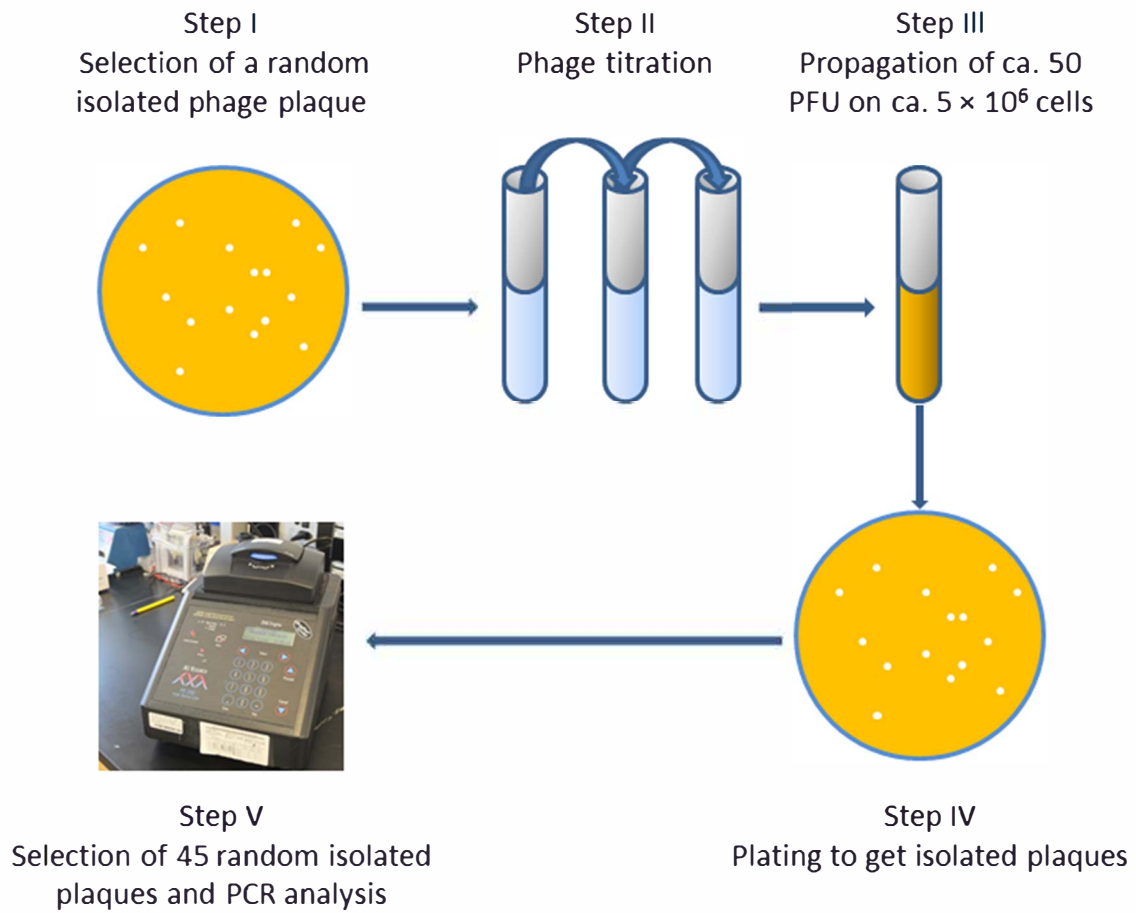

Fig. S1. Schematic representation of a single-plaque diversity generation experiment.
